# Supplementary material
Source: PubMed Central journal article supplement (PMC3494589)
Supplement: auto-8-1590-s01.pdf [file auto-8-1590-s01.pdf]

## **Supplemental Material to:**

**Milton Osmar Aguilera, Walter Berón  
and María Isabel Colombo**

**The actin cytoskeleton participates in the early events  
of autophagosome formation upon starvation induced  
autophagy**

**Autophagy 2012; 8(11)**

**<http://dx.doi.org/10.4161/auto.21459>**

**[www.landesbioscience.com/journals/autophagy/article/21459](http://www.landesbioscience.com/journals/autophagy/article/21459)**

Figure S1

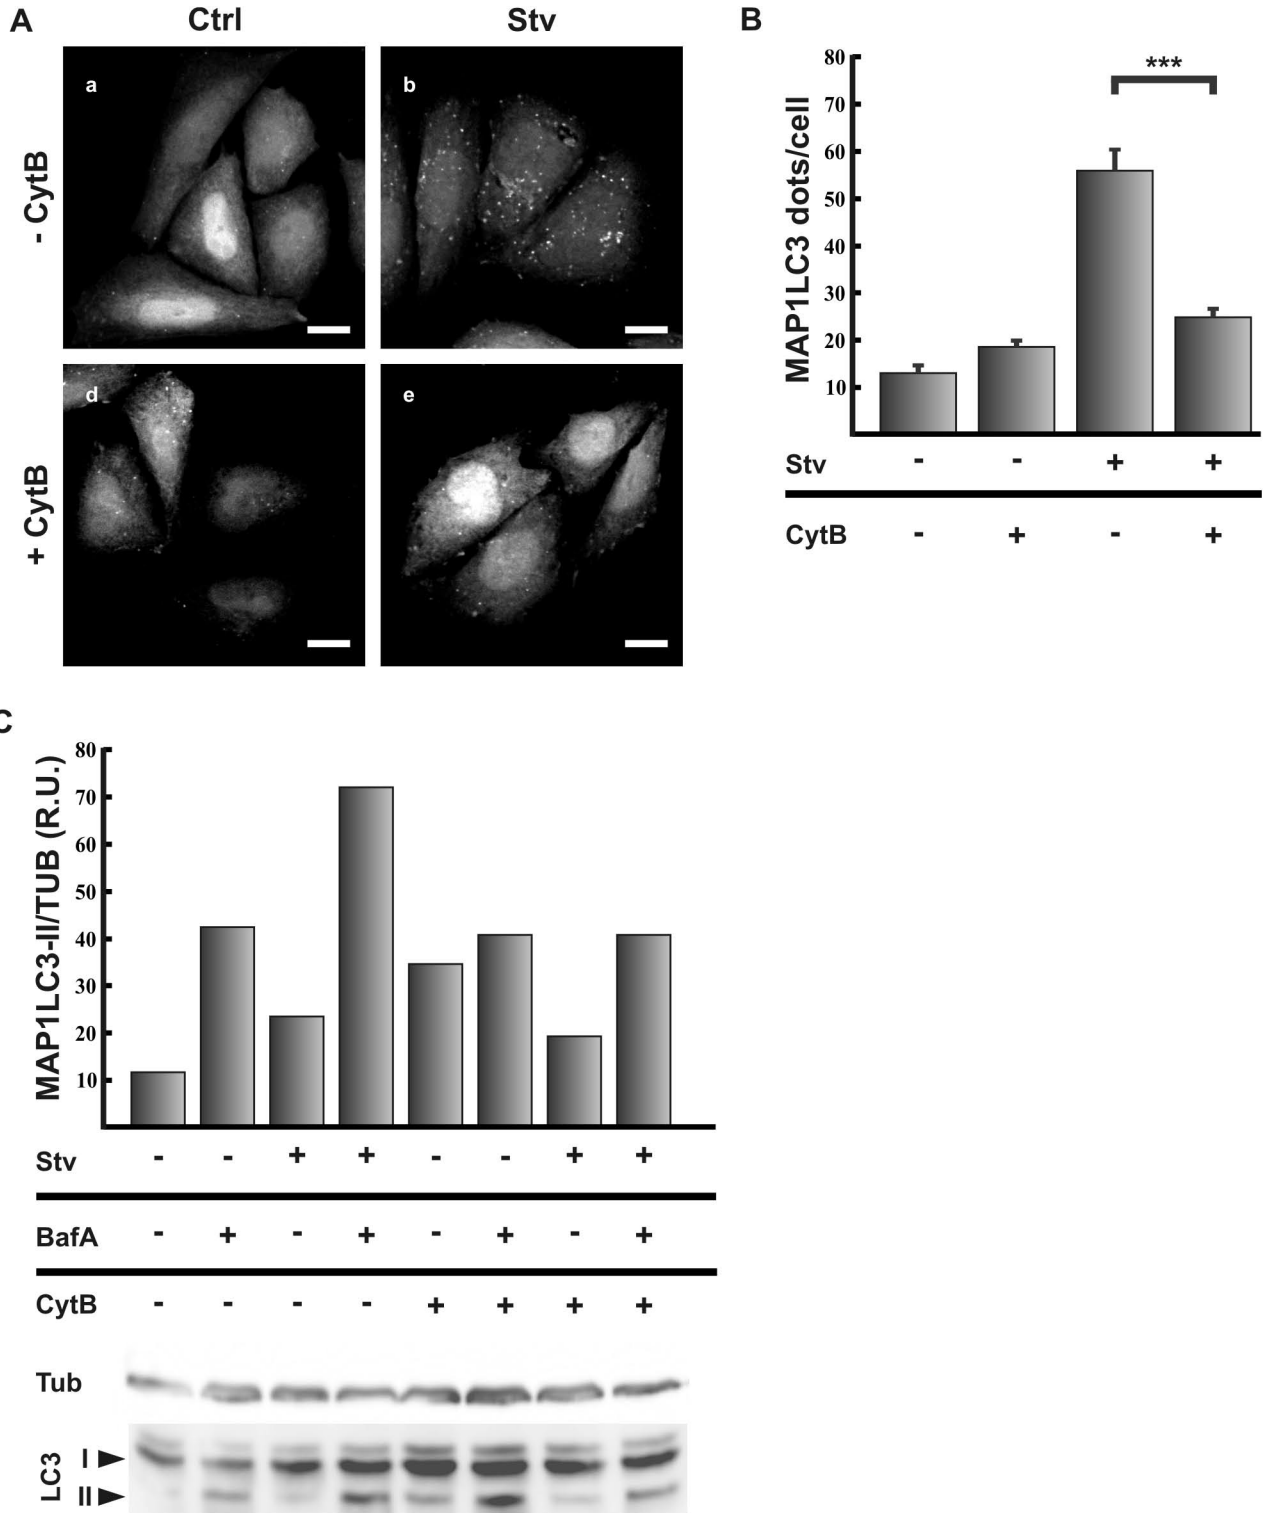

Figure S2

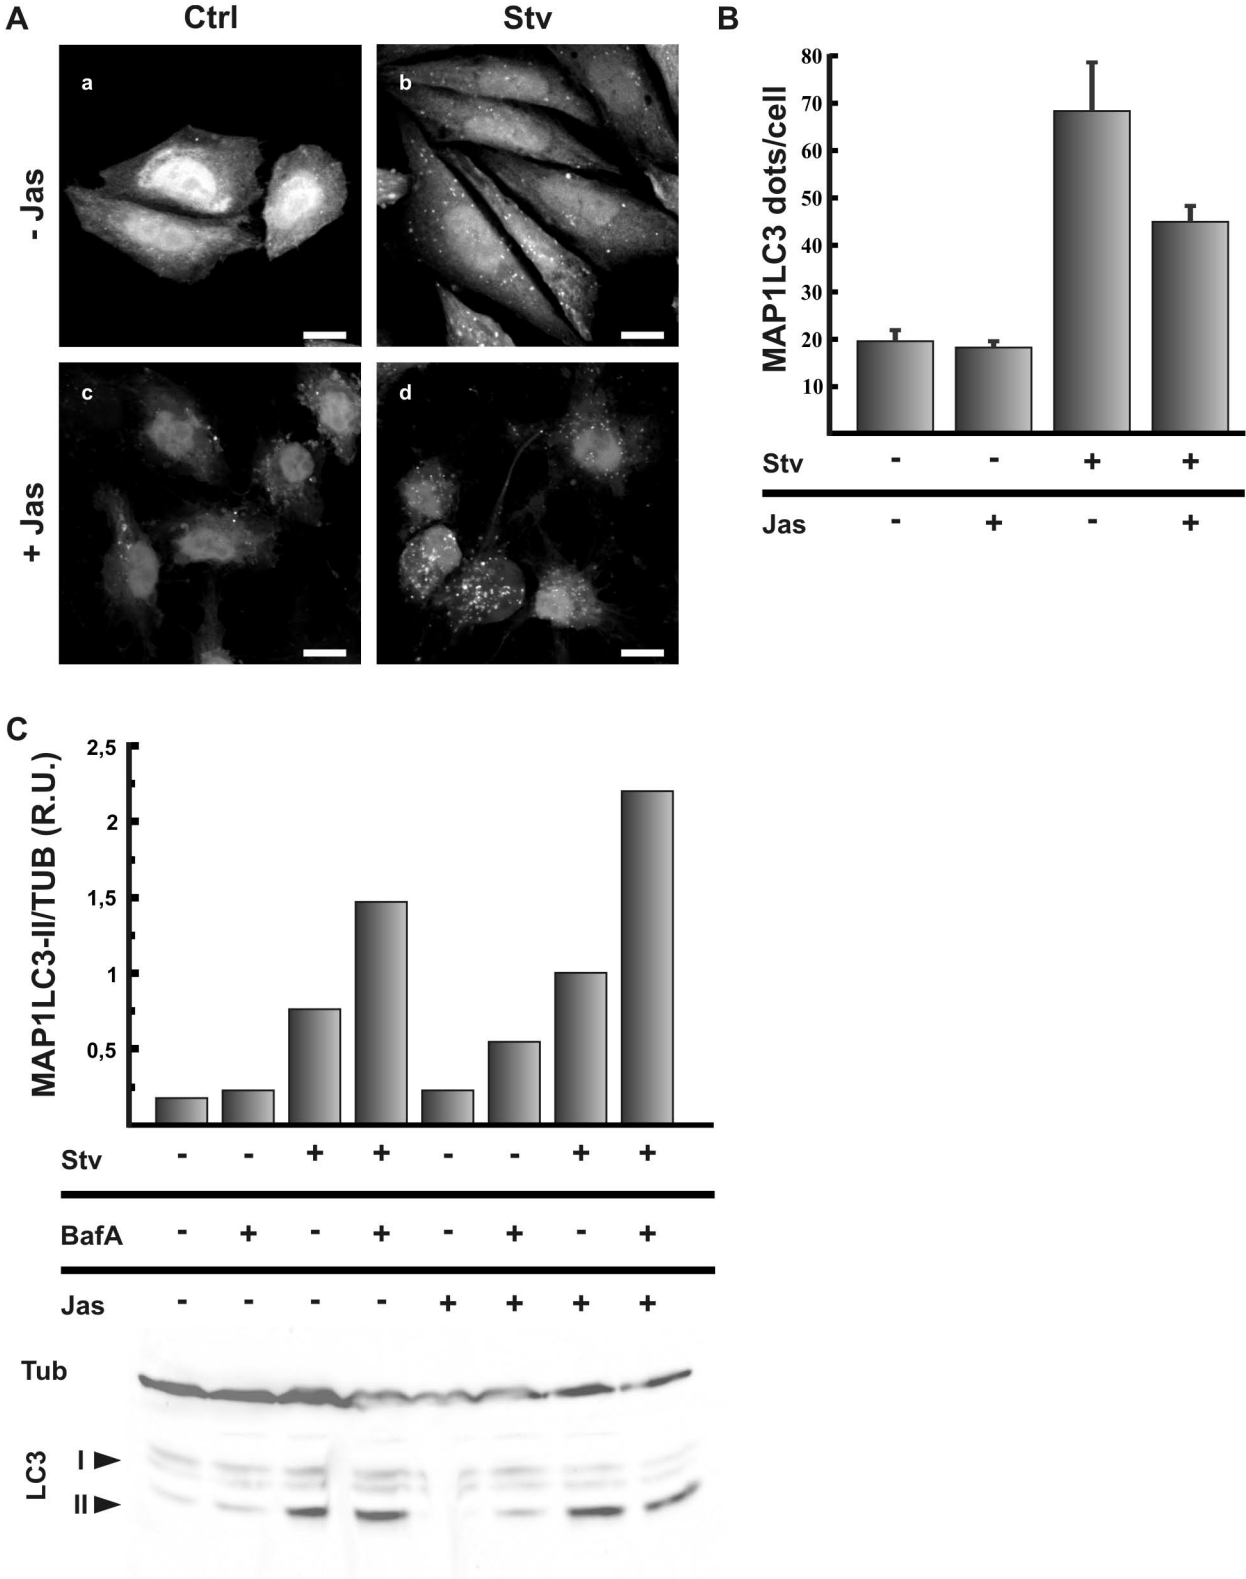

Figure S3

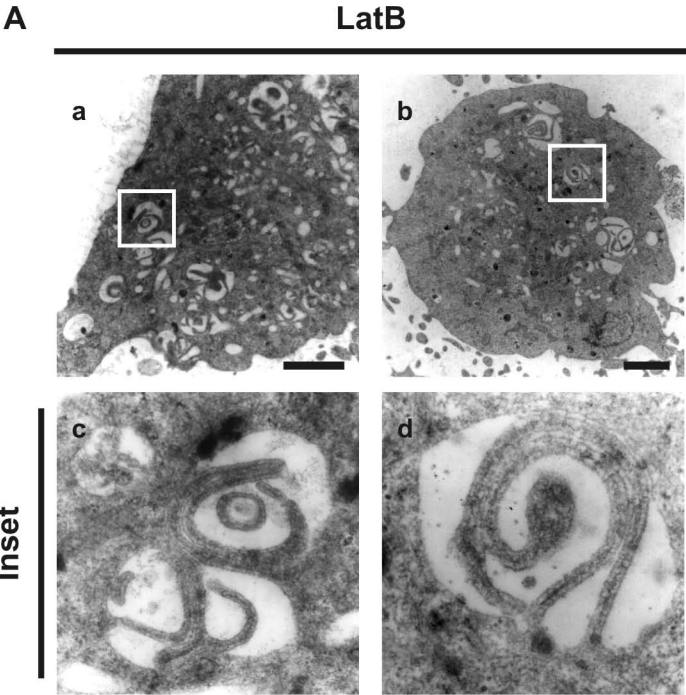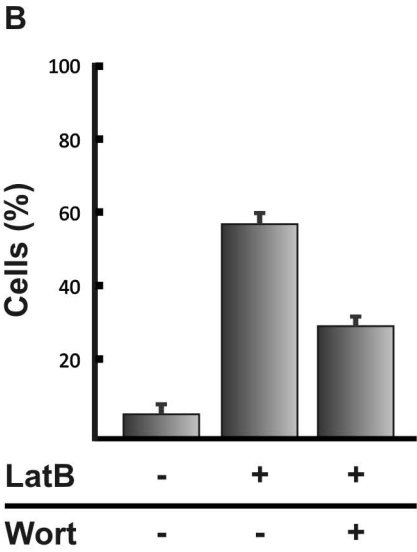

Figure S4

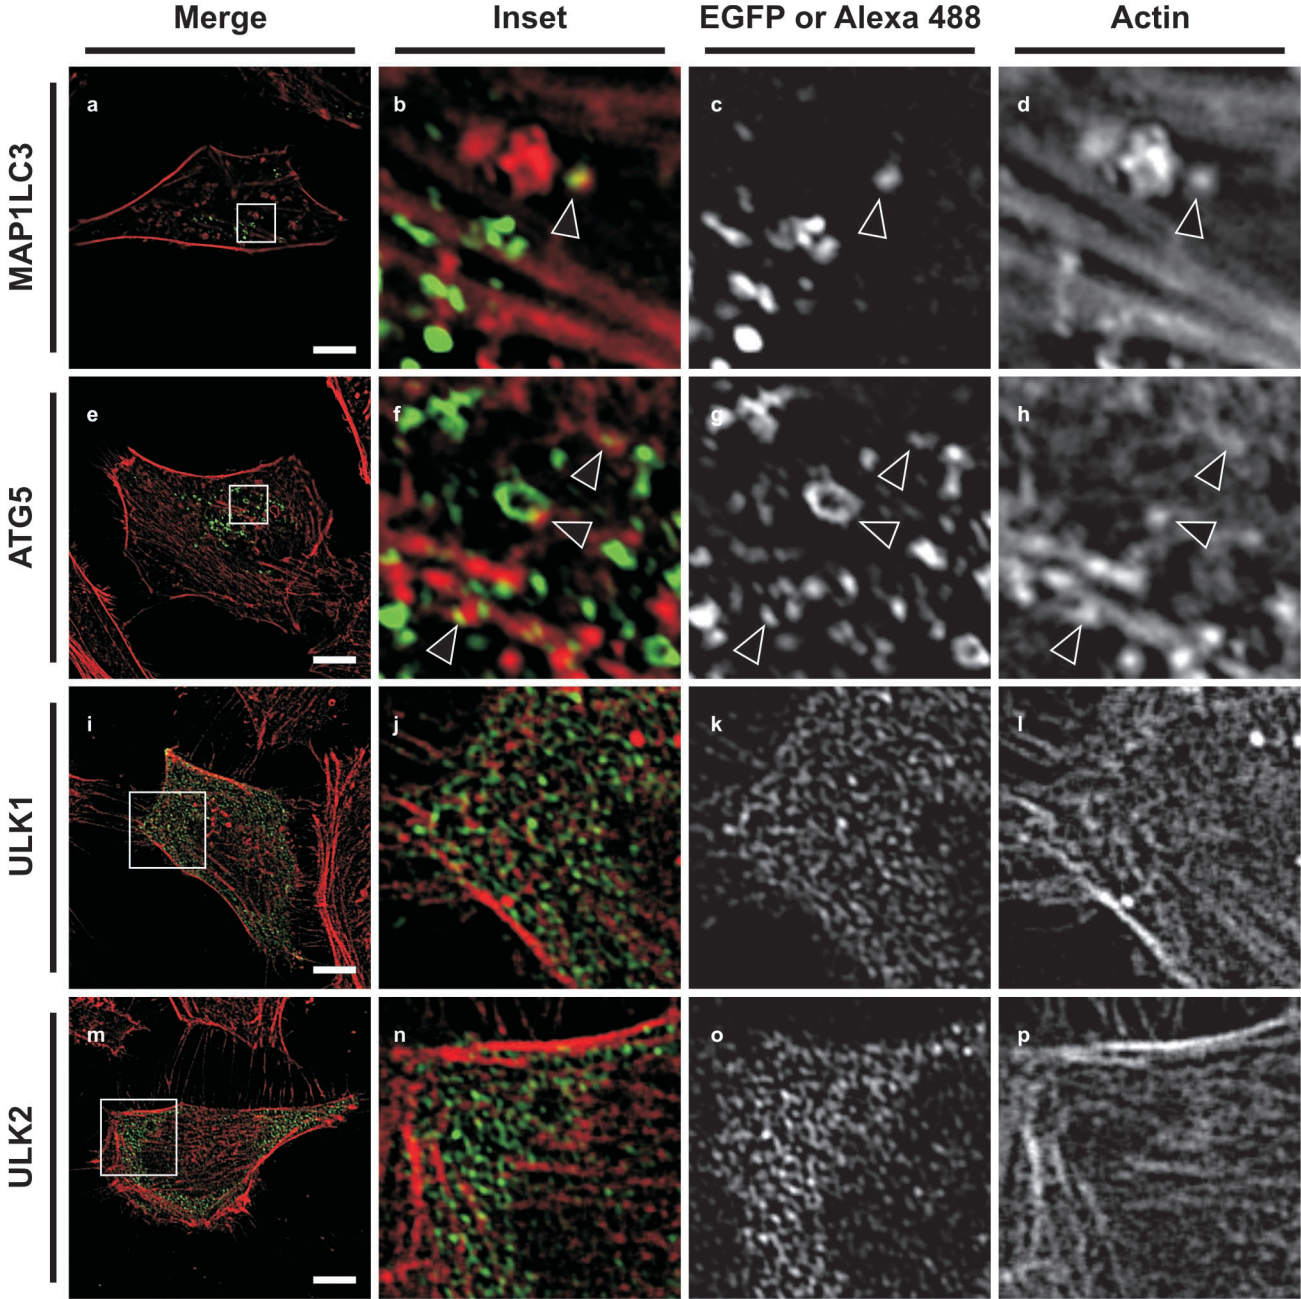

Figure S5

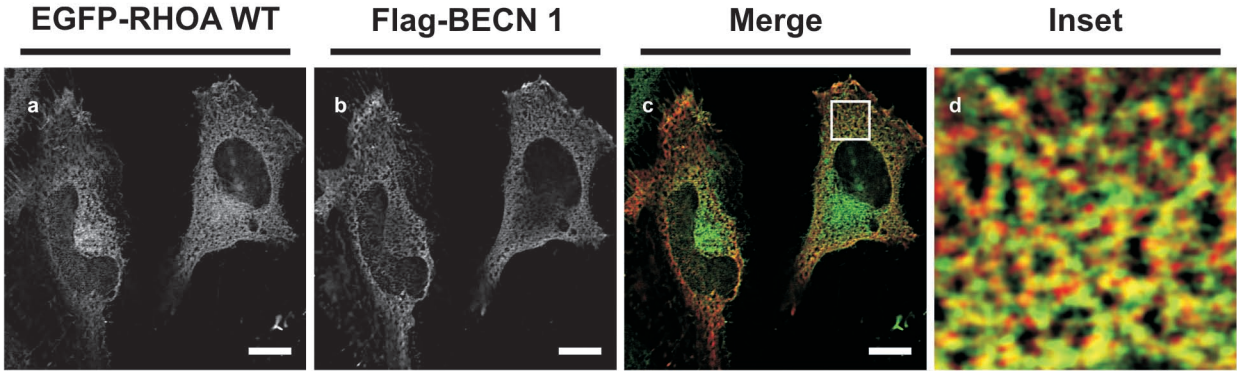

1 **Figure S1. Actin filaments disruption prevented the autophagic response upon starvation.** (A)  
2 CHO cells stable expressing EGFP-MAP1LC3 were incubated for 2 h at 37°C in full-nutrient  
3 medium (Ctrl) (a and d) or starvation medium (Stv) (b and e); in the presence (d and e) or  
4 absence (a and b) of the actin depolymerizing agent Cytochalasin B (CytB) (2.5  $\mu$ M).  
5 Subsequently, cells were fixed in 3% paraformaldehyde and processed for  
6 immunofluorescence. (B) The EGFP-MAP1LC3 dots were quantified from max intensity  
7 projection of a confocal z-stack and the mean+S.E.M. of the number of dots per cell is shown.  
8 The data evaluated correspond to three independent experiments. (C) HeLa cells were  
9 incubated in starvation medium in the presence or absence of 2.5  $\mu$ M Cytochalasin B (CytB),  
10 with or without 100 nM bafilomycin A<sub>1</sub> (BafA) for 2 h at 37°C. Afterwards, cells were lysed in  
11 RIPA buffer and the samples were subjected to western blot analysis using a rabbit anti-  
12 MAP1LC3 and a mouse anti-TUB antibodies and the corresponding HRP-labeled secondary  
13 antibody, and subsequently developed with an enhanced chemiluminescence detection kit.  
14 The bands intensity was quantified with ImageJ software (gel analyzer plugin), and the  
15 MAP1LC3-II/TUB was calculated. Data shown is representative of two independent  
16 experiments. Scale bars shown in (A) represent 10  $\mu$ m.

17 **Figure S2. Stabilization of actin cytoskeleton does not affect autophagosome formation.** (A)  
18 CHO cells stable expressing EGFP-MAP1LC3 were incubated for 2 h at 37°C in full-nutrient  
19 medium (Ctrl) (a and c) or starvation medium (Stv) (b and d), in the presence (c and d) or  
20 absence (a and b) of the actin stabilizing agent Jasplakinolide (Jas) (1  $\mu$ M). Subsequently, cells  
21 were fixed in 3% paraformaldehyde and processed for immunofluorescence. (B) The EGFP-  
22 MAP1LC3 dots were quantified from max intensity projection of a confocal z-stack and the  
23 mean+S.E.M. of the number of dots per cell is shown. (C) HeLa cells were incubated in control  
24 or starvation medium in the presence or absence of Jasplakinolide (Jas) (1  $\mu$ M), and/or 100 nM  
25 bafilomycin A<sub>1</sub> (BafA) for 2 h at 37°C. Afterwards, cells were lysed in RIPA buffer and the  
26 samples were subjected to western blot analysis using a rabbit anti-MAP1LC3 and mouse anti-  
27 TUB antibodies and the corresponding HRP-labeled secondary antibody, and subsequently  
28 developed with an enhanced chemiluminescence detection kit. The bands intensity was  
29 quantified with ImageJ software (gel analyzer plugin), and the MAP1LC3-II/TUB ratio was  
30 calculated. Data shown is representative of two independent experiments. Scale bars depicted  
31 in (A) represent 10  $\mu$ m.

32 **Figure S3. Latrunculin B treatment generates an accumulation of curved membranous**  
33 **structures.** (A) HeLa cells were incubated for 2 h at 37°C in starvation medium in the presence  
34 or absence of 10  $\mu$ M Latrunculin B (LatB), with or without 0.2  $\mu$ M of wortmannin (Wort).  
35 Afterwards, cells were fixed, processed and analyzed by electron microscopy using  
36 conventional techniques. In the micrographs and in the insets membranous whirled structures  
37 that may represent aberrant isolation membranes or phagophores are visualized. (B)  
38 Quantification of the percentage of cells with this type of structures. Scale bars shown in (A)  
39 represent 5  $\mu$ m.

40

41

42 **Figure S4. Actin filaments do not colocalize with certain autophagic markers.** HeLa cells  
43 overexpressing GFP-MAP1LC3 (a-d), EGFP-ATG5 (e-h), myc-ULK1 (i-l), or myc-ULK2 (m-p), were  
44 incubated in starvation medium for 2 h at 37°C. Subsequently, cells were fixed in 3%  
45 paraformaldehyde and processed for immunofluorescence and actin filaments were stained  
46 using Phalloidin-Rhodamine. To stain myc-ULK1/2, a mouse anti-myc antibody and an anti-  
47 mouse Alexa Fluor 488 secondary antibody was used. Scale bars represent 10 μm. Arrowheads  
48 indicate colocalization sites.

49 **Figure S5. RHOA colocalizes with BECN1.** HeLa cells overpressing Flag-BECN1 1 (a-d), were  
50 incubated in starvation medium for 2 h at 37°C. Subsequently, cells were fixed in 3%  
51 paraformaldehyde and processed for immunofluorescence and actin filaments were stained  
52 using Phalloidin-Rhodamine. To stain FLAG-BECN1 1, a mouse anti-flag antibody and an anti-  
53 mouse Alexa Fluor 488 secondary antibody was used. Scale bars represent 10 μm.
